# Supplementary material for: Evaluation of Epirubicin in Thermogelling and Bioadhesive Liquid and Solid Suppository Formulations for Rectal Administration
Source: MDPI journal article supplement (doi:10.3390/ijms15010342), 2013-12-31
Supplement: s1 [file s1]

## Supplementary Information

**Figure S1.** FTIR spectra of (A) Formulation 1 for 6 months; (B) Formulation 1 for 12 months; (C) Formulation 4 for 6 months; and (D) Formulation 4 for 12 months. These preparations were stored at (a) 4 °C, (b) 25 °C, and (c) 37 °C.

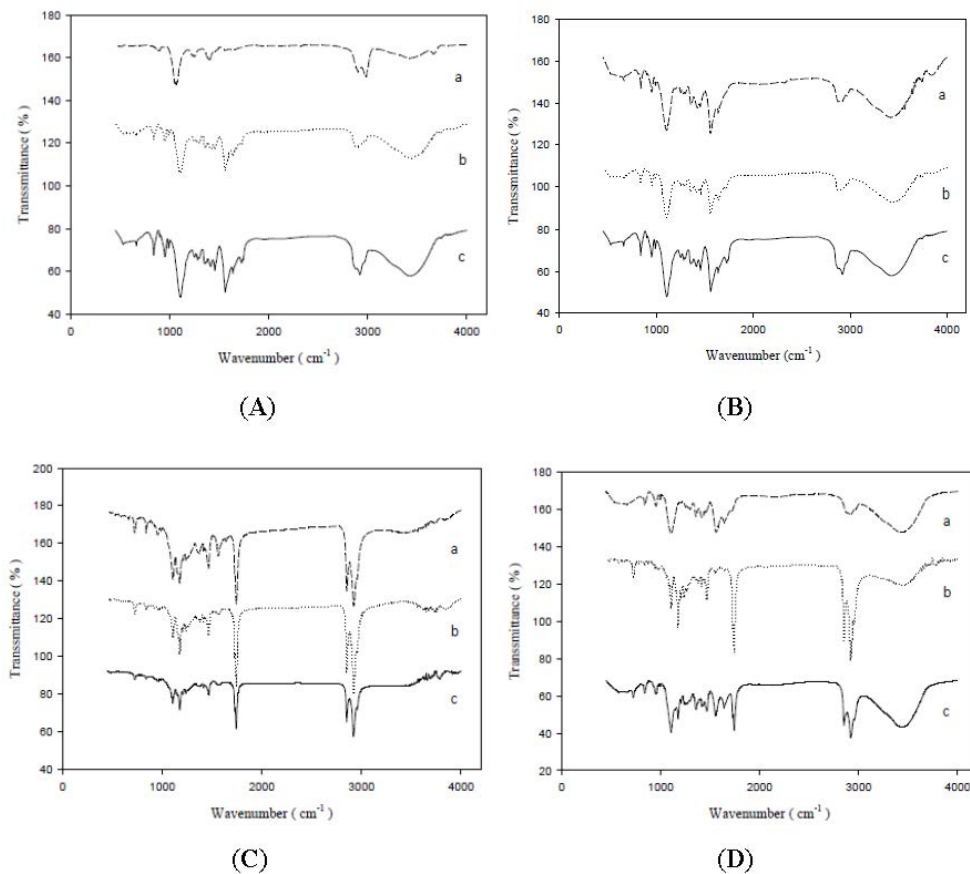

© 2013 by the authors; licensee MDPI, Basel, Switzerland. This article is an open access article distributed under the terms and conditions of the Creative Commons Attribution license (<http://creativecommons.org/licenses/by/3.0/>).
